# Supplementary material
Source: MDPI journal article supplement (https://www.mdpi.com/2624-5175/3/3/23)
Supplement: s1 [file s1]

**Table S1.** Means and standard deviations of actigraphic sleep/wake parameters measured at T0 and T1 in the responder (R) group.

|              | T0             | T1             | Statistics        |                |           |
|--------------|----------------|----------------|-------------------|----------------|-----------|
|              |                |                | t <sub>(13)</sub> | p <sup>a</sup> | Cohen's d |
| <b>Sleep</b> |                |                |                   |                |           |
| BT           | 23:13 ± 1:07   | 23:34 ± 1:28   | -1.65             | .12            | .44       |
| GUT          | 06:47 ± 0:52   | 06:58 ± 1:19   | -.69              | .50            | .18       |
| TIB          | 455.1 ± 60.06  | 444.04 ± 51.38 | 1.23              | .24            | .33       |
| MS           | 02:59 ± 0:52   | 03:16 ± 1:19   | -1.19             | .26            | .32       |
| SMA          | 12.44 ± 3.77   | 12.86 ± 3.69   | -.43              | .68            | .11       |
| SOL          | 13.3 ± 7.22    | 14.78 ± 6.73   | -.59              | .56            | .16       |
| TST          | 424.16 ± 57.27 | 409.68 ± 52.55 | 1.64              | .13            | .44       |
| WASO         | 18.57 ± 9.98   | 19.69 ± 9.96   | -.34              | .74            | .09       |
| SE           | 93.16 ± 2.87   | 95.34 ± 2.44   | -2.84             | .01            | .76       |
| AWK          | 9.44 ± 3.93    | 9.48 ± 3.28    | -.03              | .98            | .01       |
| AWK>5        | 1.91 ± .76     | 2.33 ± .98     | -1.31             | .21            | .35       |
| <b>Wake</b>  |                |                |                   |                |           |
| DMA          | 215.04 ± 23.66 | 211.52 ± 23.93 | .94               | .37            | .25       |
| DTST         | 34.45 ± 40.98  | 28.40 ± 27.75  | .60               | .56            | .16       |
| NAP          | 4.07 ± 3.38    | 3.83 ± 2.63    | .34               | .74            | .09       |
| NAPD         | 18.64 ± 21.29  | 13.05 ± 11.61  | .97               | .35            | .26       |

Note: BT=bedtime (h:min); GUT=get-up time (h:min); TIB=time in bed (min.); MS=midpoint of sleep (h:min); SMA=sleep motor activity (counts); SOL=sleep onset latency (min.); TST=total sleep time (min.); WASO=wake after sleep onset (min.); SE=sleep efficiency (%); AWK=awakenings (number); AWK>5=awakenings lasting more than 5 minutes (number); DMA=diurnal motor activity (counts); DTST=diurnal total sleep time (min.); NAP=diurnal sleep episodes (number); NAPD=duration of the longest sleep episode (min.).

<sup>a</sup> Since multiple comparisons were performed, the Bonferroni correction was applied, leading to consider as significant p-values less than .0008.

**Table S2.** Means and standard deviations of actigraphic sleep/wake parameters measured at T0 and T1 in the non-responder (NR) group.

|              | T0             | T1             | Statistics       |                |           |
|--------------|----------------|----------------|------------------|----------------|-----------|
|              |                |                | t <sub>(3)</sub> | p <sup>a</sup> | Cohen's d |
| <b>Sleep</b> |                |                |                  |                |           |
| BT           | 23:32 ± 0:31   | 23:04 ± 0:39   | 2.23             | .11            | 1.13      |
| GUT          | 07:26 ± 0:58   | 07:19 ± 0:40   | .31              | .78            | .15       |
| TIB          | 470.1 ± 64.36  | 500.35 ± 54.76 | -.97             | .40            | .48       |
| MS           | 03:31 ± 0:34   | 03:08 ± 0:24   | 2.52             | .09            | 1.28      |
| SMA          | 14.85 ± 6.95   | 16.24 ± 5.70   | -.89             | .44            | .45       |
| SOL          | 10.75 ± 4.97   | 19.35 ± 11.50  | -1.38            | .26            | .69       |
| TST          | 416.1 ± 31.60  | 434.7 ± 31.55  | -1.05            | .37            | .53       |
| WASO         | 42.25 ± 39.70  | 45.95 ± 31.67  | -.25             | .82            | .12       |
| SE           | 89.32 ± 7.66   | 90.83 ± 6.16   | -.58             | .60            | .29       |
| AWK          | 12.05 ± 8.31   | 12.1 ± 5.34    | -.02             | .98            | .01       |
| AWK>5        | 3.9 ± 3.39     | 4.6 ± 2.48     | -.58             | .60            | .29       |
| <b>Wake</b>  |                |                |                  |                |           |
| DMA          | 191.93 ± 15.46 | 184.59 ± 12.55 | .93              | .42            | .47       |
| DTST         | 34.06 ± 37.19  | 40.21 ± 34.96  | -1.74            | .18            | .82       |
| NAP          | 4 ± 4.04       | 3.46 ± 3.15    | .62              | .58            | .31       |
| NAPD         | 19 ± 15.27     | 22.79 ± 16.67  | -.85             | .46            | .43       |

Note: BT=bedtime (h:min); GUT=get-up time (h:min); TIB=time in bed (min.); MS=midpoint of sleep (h:min); SMA=sleep motor activity (counts); SOL=sleep onset latency (min.); TST=total sleep time (min.); WASO=wake after sleep onset (min.); SE=sleep efficiency (%); AWK=awakenings (number); AWK>5=awakenings lasting more than 5 minutes (number); DMA=diurnal motor activity (counts); DTST=diurnal total sleep time (min.); NAP=diurnal sleep episodes (number); NAPD=duration of the longest sleep episode (min.).

<sup>a</sup> Since multiple comparisons were performed, the Bonferroni correction was applied, leading to consider as significant p-values less than .0008.

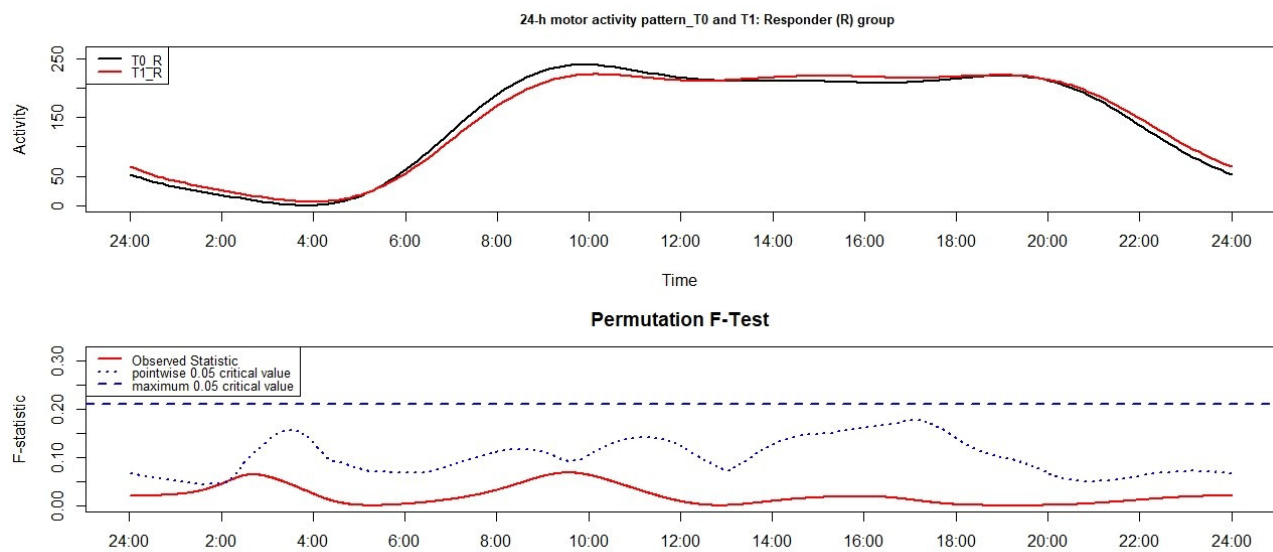

**Figure S1** – Results of the functional linear modeling applied to the comparison of 24-h motor activity pattern, monitored at T0 and T1, of the responder (R) group. The functional forms of the 24-h motor activity patterns at T0 and T1 are reported in the upper panel while the results of the non-parametric permutation F-test in the lower panel. Significant results are observed when the solid red line is above the blue dashed line.

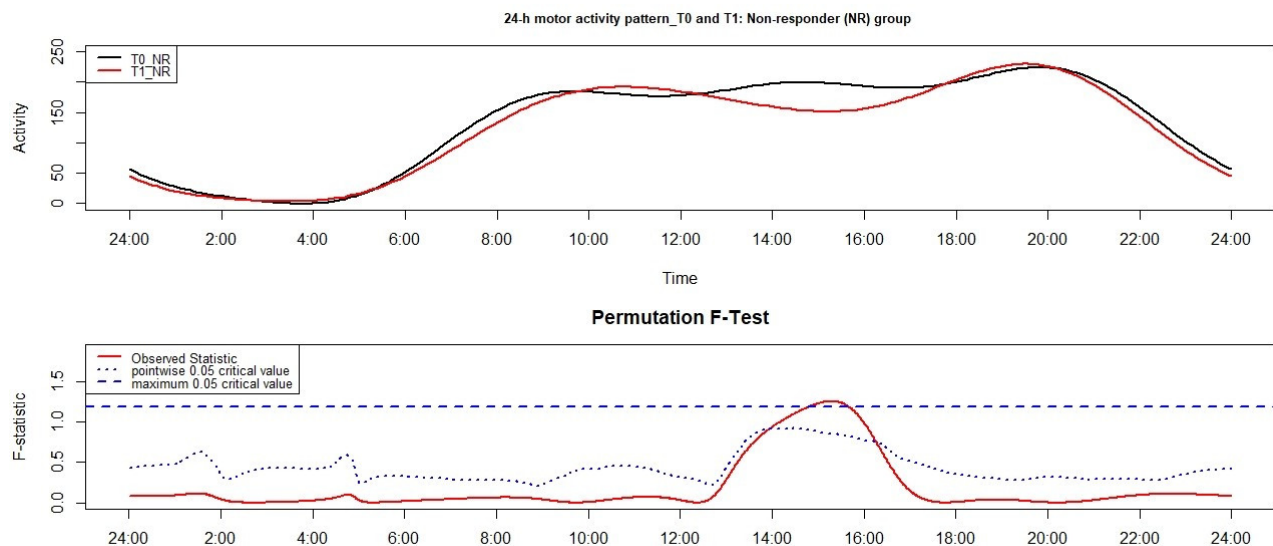

**Figure S2** – Results of the functional linear modeling applied to the comparison of 24-h motor activity pattern, monitored at T0 and T1, of the non-responder (NR) group. The functional forms of the 24-h motor activity patterns at T0 and T1 are reported in the upper panel while the results of the non-parametric permutation F-test in the lower panel. Significant results are observed when the solid red line is above the blue dashed line.
